# Supplementary material for: Atmospheric Rivers as Triggers of Compound Flooding: Quantifying Extreme Joint Events in Western North America Under Climate Change
Source: Copernicus journal article supplement (doi:10.5194/egusphere-2025-2481), 2025-06-25
Supplement: Supplementary file 1 [file egusphere-2025-2481-supplement.pdf]

Supporting Information for

# **Atmospheric Rivers as Triggers of Compound Flooding: Quantifying Extreme Joint Events in Western North America Under Climate Change**

Andrew Vincent Grgas-Svirac<sup>1</sup>, Mohammad Fereshtehpour<sup>1</sup>, M. Reza Najafi<sup>1</sup>, Alex J. Cannon<sup>2</sup>,  
Hamidreza Shirkhani<sup>3</sup>

<sup>1</sup>Department of Civil and Environmental Engineering, University of Western Ontario, London, Canada.

<sup>2</sup>Climate Research Division, Environment and Climate Change Canada, Victoria, BC, Canada.

<sup>3</sup>National Research Council Canada, Ottawa, ON, Canada

Corresponding author: M. R. Najafi (mnajafi7@uwo.ca )

Contents of this file

Figures S1-S2

## **Introduction**

Supporting information includes three figures. Figure S1 shows the joint probability of occurrence for AR related CIF events for all warming levels. Figure S2 shows the joint probability of occurrence for CIF events.

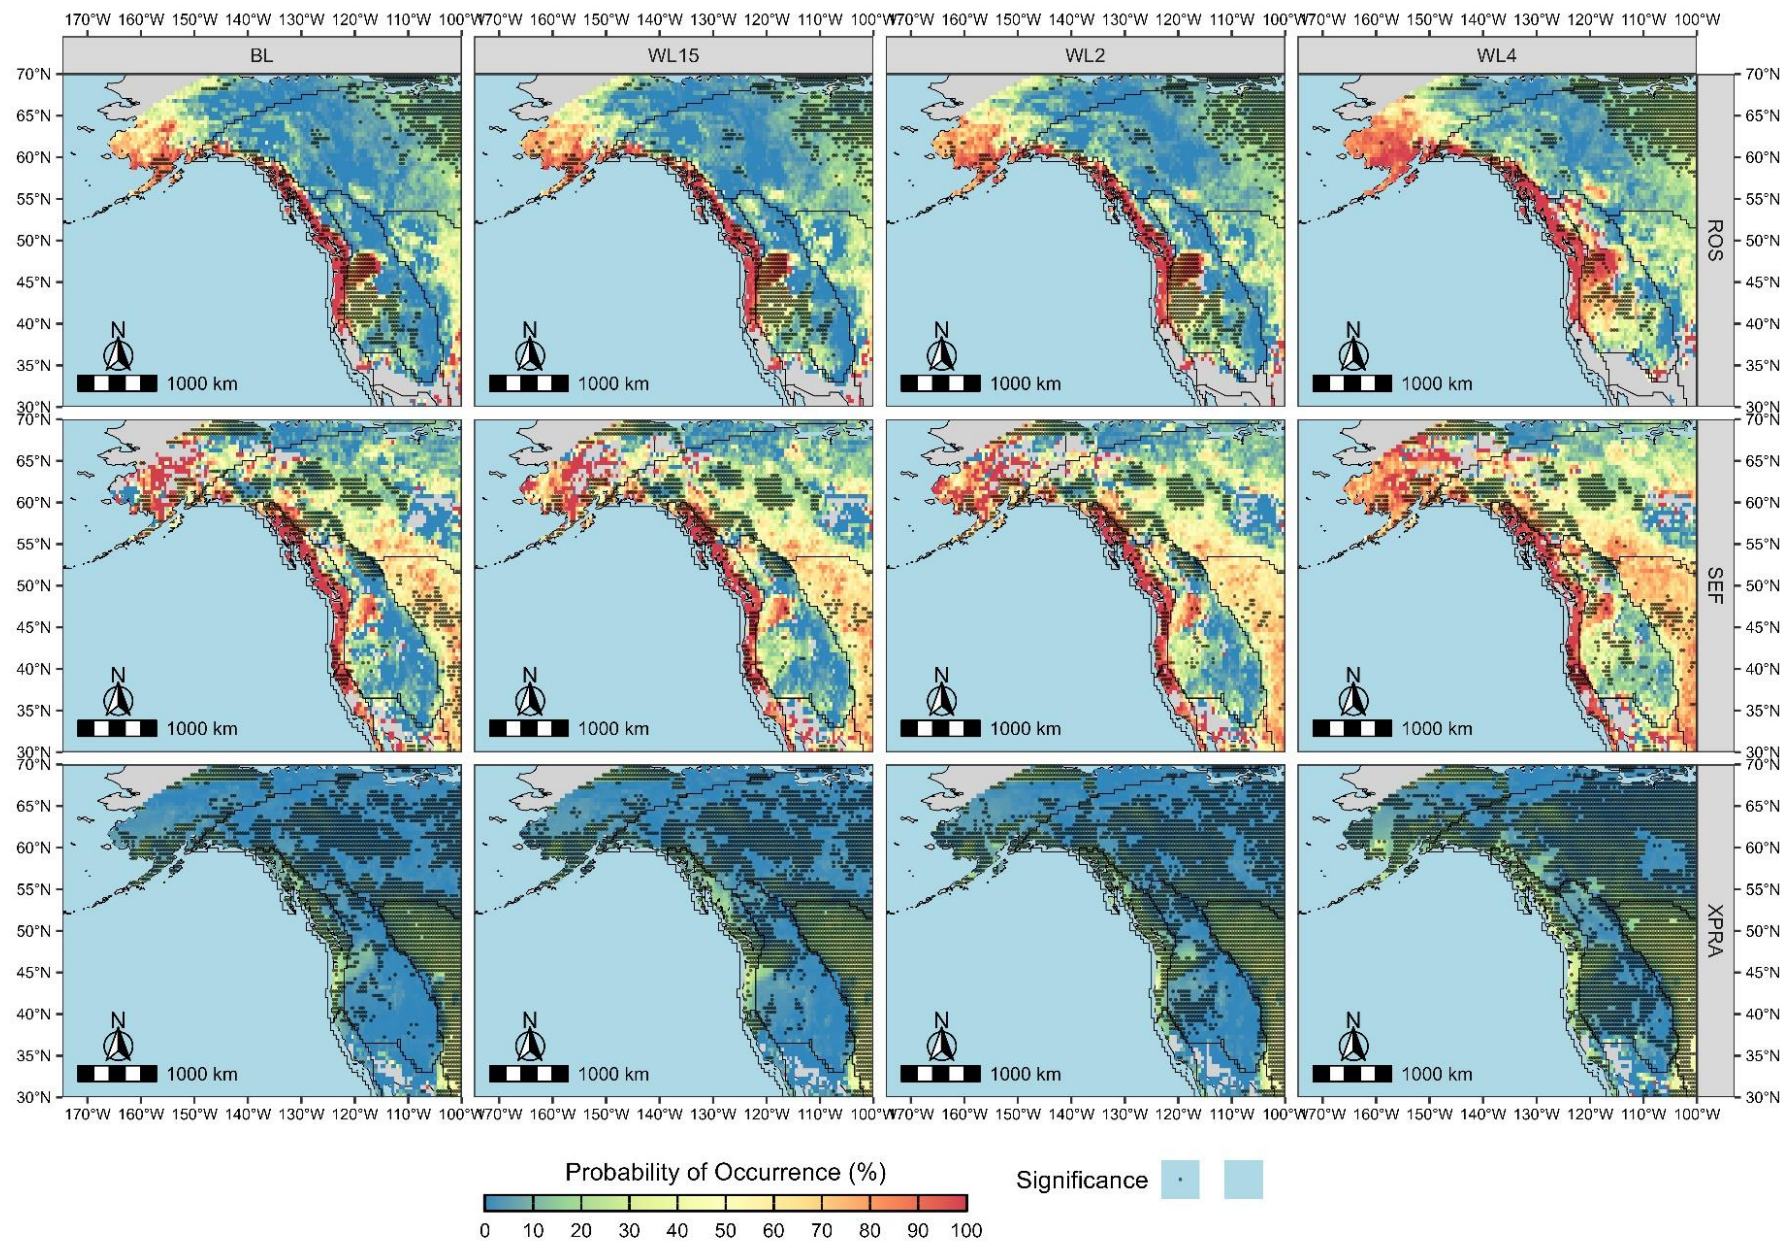

**Figure S1.** Spatial plot of probability of occurrence of an AR event given that ROS, SEF and XPRA events are occurring. Statistically significant results are represented by areas with stippling.



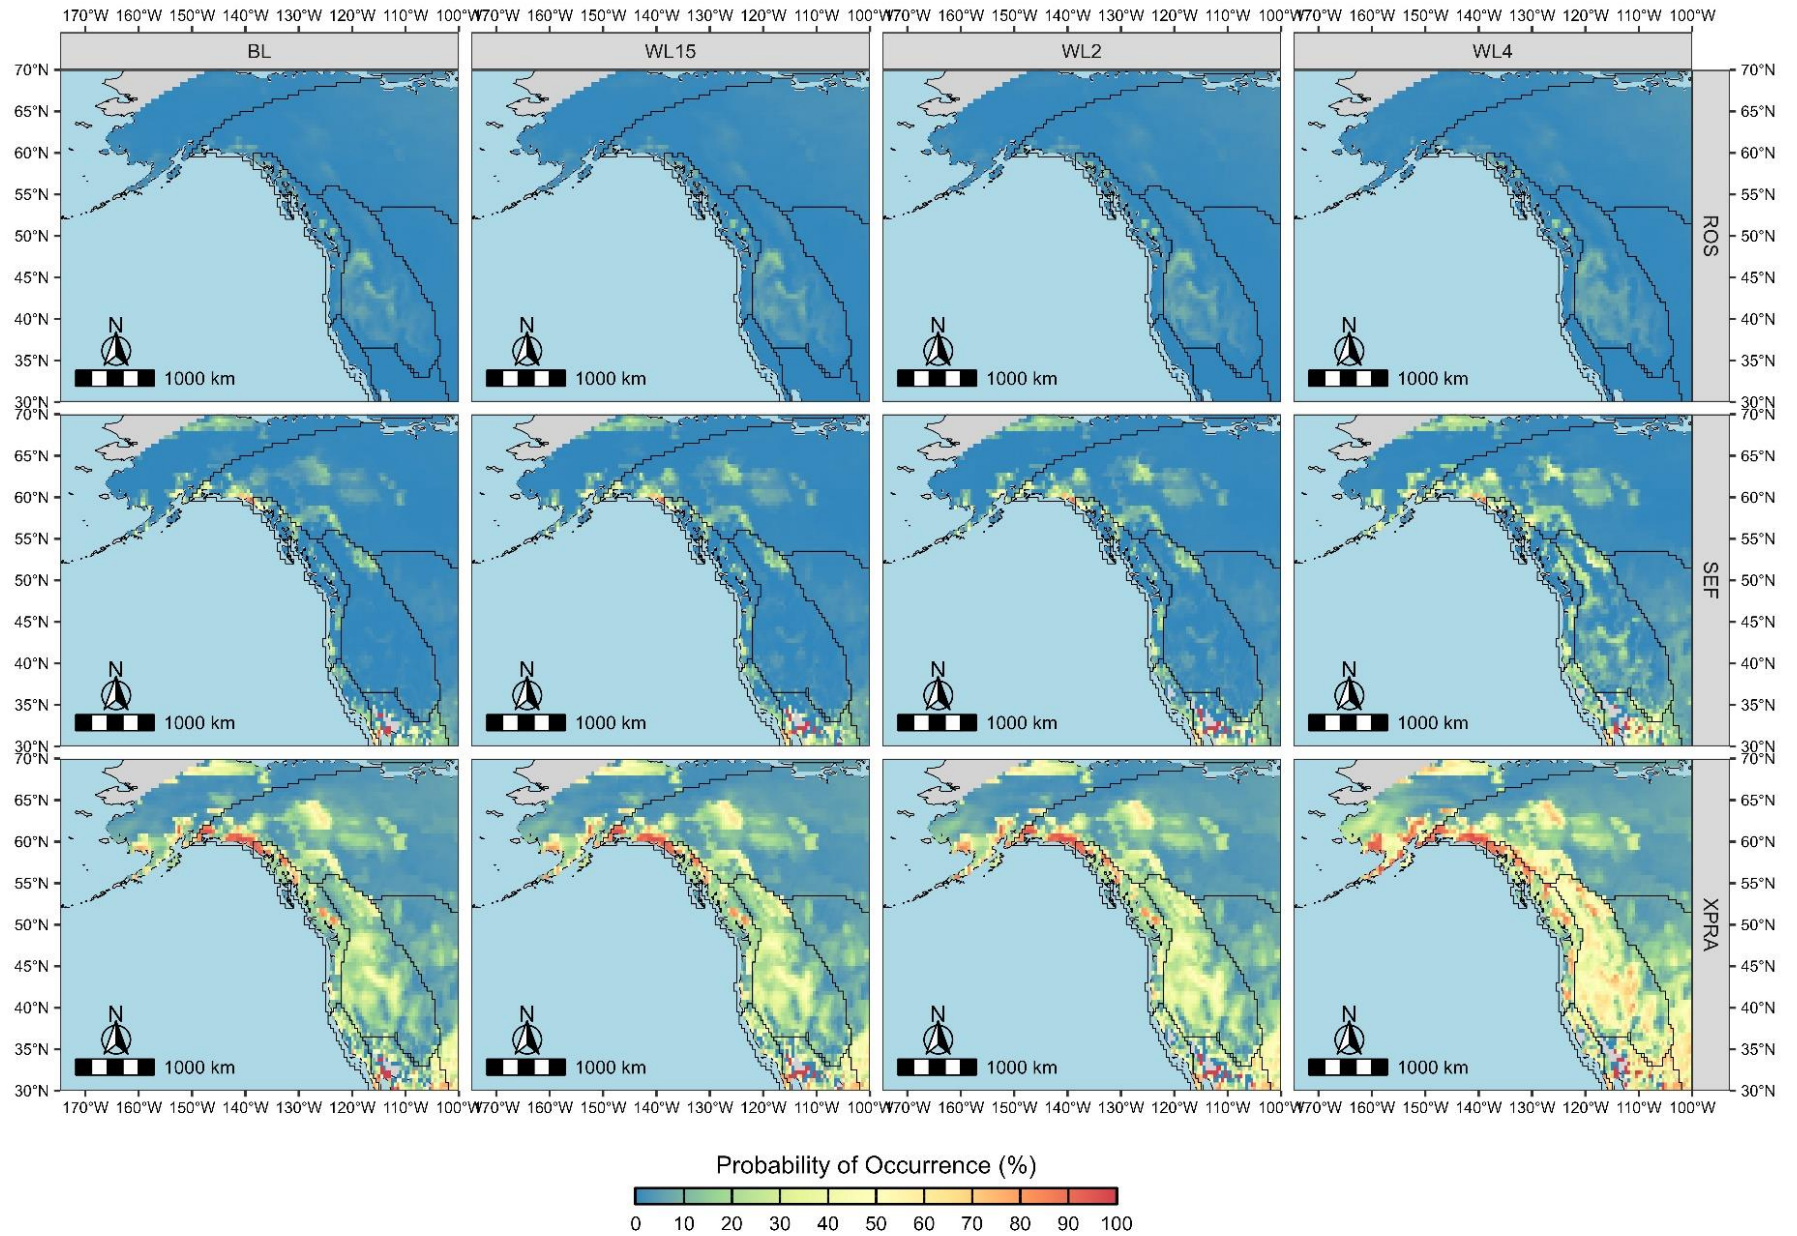

**Figure S2.** Spatial plot of probability of occurrence of ROS, SEF and XPRA events are occurring. Statistically significant results are represented by areas with stippling.
